# Supplementary material for: A high-resolution, chromosome-assigned Komodo dragon genome reveals adaptations in the cardiovascular, muscular, and chemosensory systems of monitor lizards
Source: bioRxiv or medRxiv preprint supplement (doi:10.1101/551978), 2019-02-26
Supplement: Supplementary file [file media-1.pdf]

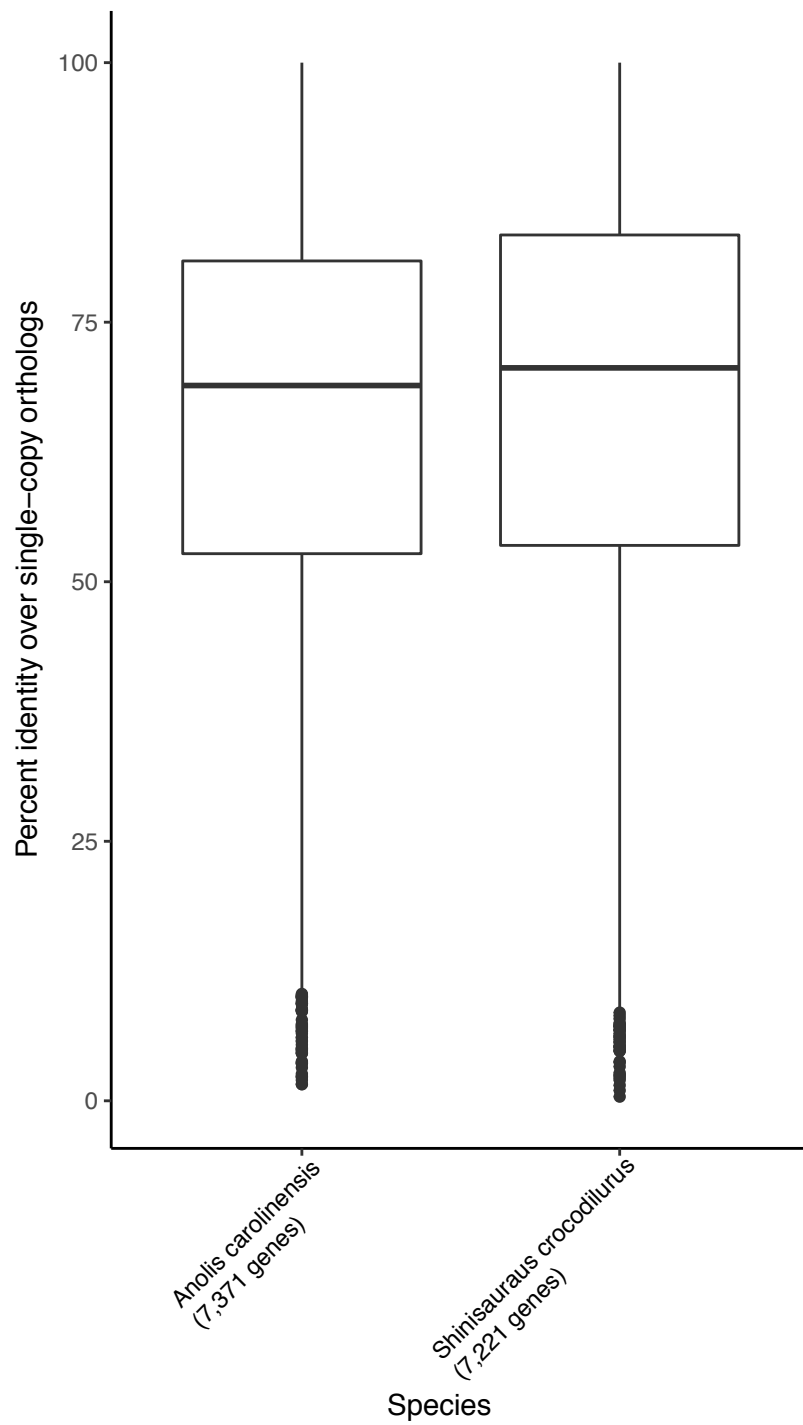

Figure S1. Percent identities of single-copy orthologs between the Komodo dragon and the green anole and the Komodo dragon and the Chinese crocodile lizard.
