# Supplementary material for: A high-resolution, chromosome-assigned Komodo dragon genome reveals adaptations in the cardiovascular, muscular, and chemosensory systems of monitor lizards
Source: bioRxiv or medRxiv preprint supplement (doi:10.1101/551978), 2019-02-26
Supplement: Supplementary file [file media-2.pdf]

**Title:** Electron Transport Chain (OXPHOS system in mitochondria)  
**Organism:** Homo sapiens

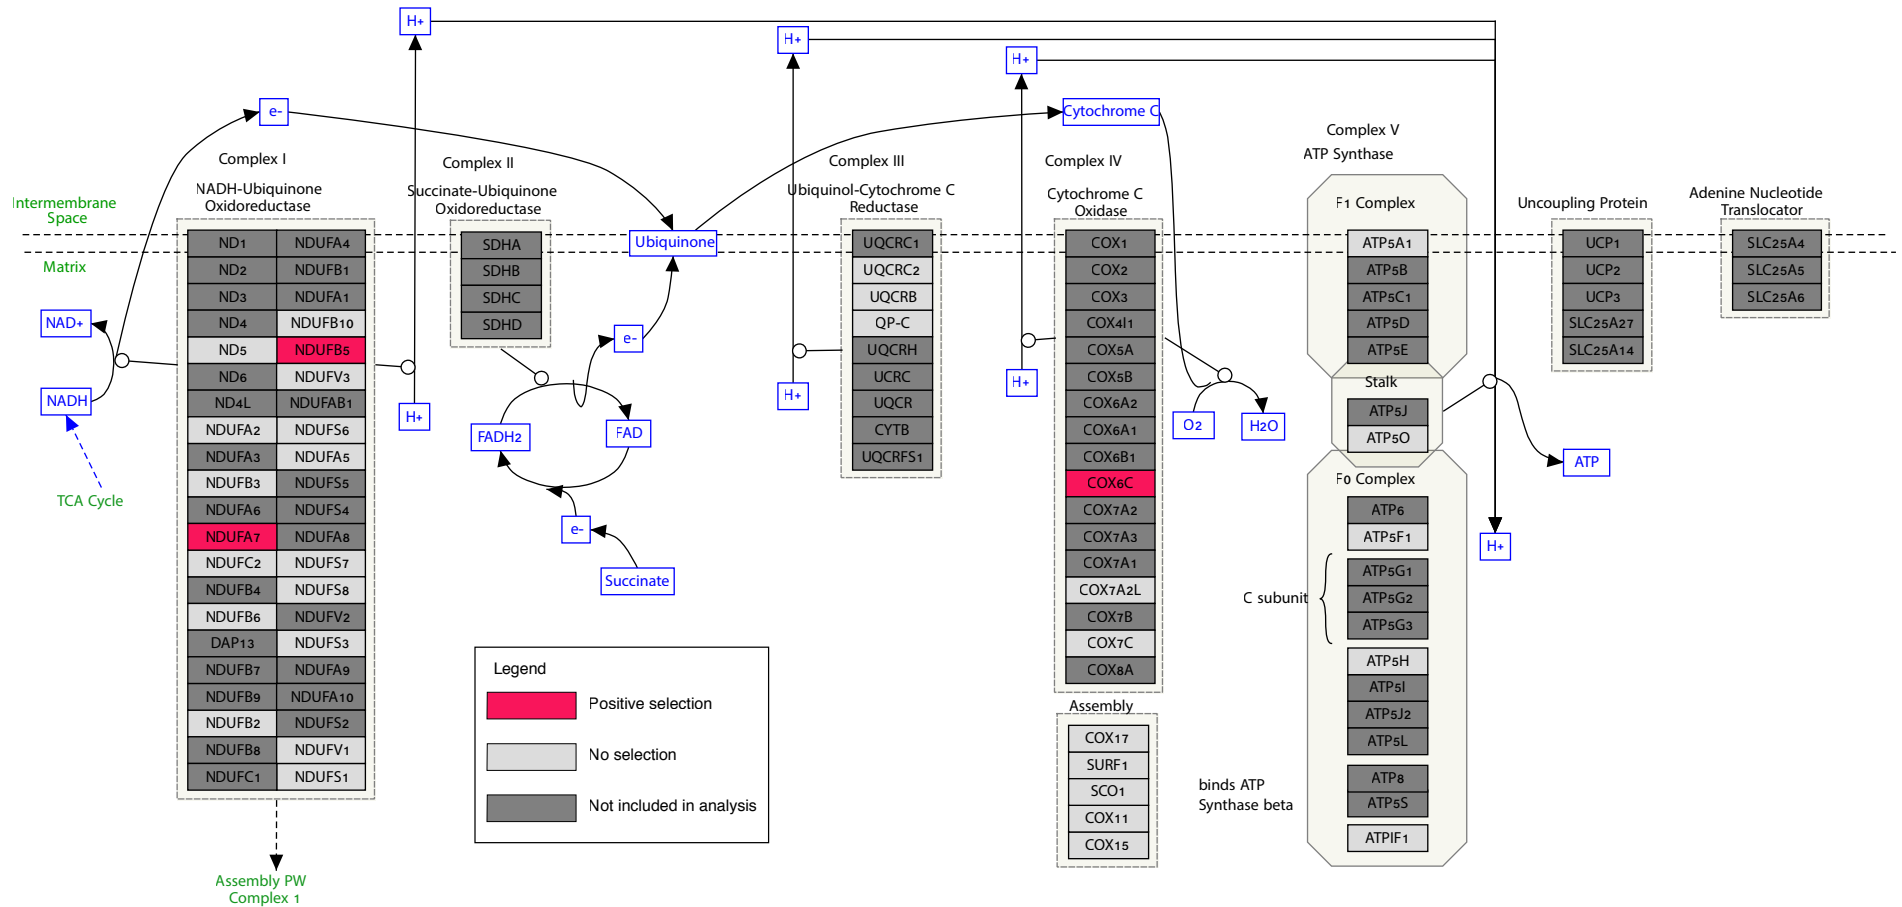

Figure S2. Positive selection on genes encoding structural proteins in the electron transport chain. Dark gray genes were not tested for positive selection due to either missing data in one or more species or difficulty resolving ortholog/paralog relationships. Pink genes have signatures of positive selection, and light gray genes did not have signatures of positive selection. Figure modified from WikiPathways 63.
